# Supplementary material
Source: Springer Nature journal article supplement (https://www.springermedizin.de/resource/supplementary/12885_2014_5151_MOESM3_ESM.pdf/9468546)
Supplement: MOESM3 [file 9468546]

**Additional Table 2. Results of meta-regression analysis exploring source of heterogeneity (univariate analysis)**

| Covariates              | PFS         |                |       |                         | PFS omitting Matsusaka et al. |                |       |                         |
|-------------------------|-------------|----------------|-------|-------------------------|-------------------------------|----------------|-------|-------------------------|
|                         | Coefficient | Standard error | P     | Adjusted R <sup>2</sup> | Coefficient                   | Standard error | P     | Adjusted R <sup>2</sup> |
| <b>Detection method</b> | 0.4146      | 0.1041         | 0.001 | 55.95%                  | 0.3460                        | 0.0932         | 0.003 | 64.60%                  |
| <b>Sampling time</b>    | 0.3544      | 0.1889         | 0.08  | 19.83%                  | 0.4370                        | 0.1405         | 0.008 | 78.03%                  |
| <b>Sample size</b>      | -0.0004     | 0.0009         | 0.692 | -10.01%                 | -0.0012                       | 0.0008         | 0.143 | 16.46%                  |
| <b>Publication year</b> | -0.0380     | 0.0733         | 0.612 | -6.02%                  | -0.0343                       | 0.0634         | 0.597 | -10.43%                 |
| Covariates              | OS          |                |       |                         | OS omitting Matsusaka et al.  |                |       |                         |
|                         | Coefficient | Standard error | P     | Adjusted R <sup>2</sup> | Coefficient                   | Standard error | P     | Adjusted R <sup>2</sup> |
| <b>Detection method</b> | 0.3406      | 0.1567         | 0.046 | 23.53%                  | 0.3146                        | 0.1543         | 0.062 | 20.74%                  |
| <b>Sampling time</b>    | 0.1217      | 0.2547         | 0.64  | -3.35%                  | 0.2908                        | 0.2400         | 0.247 | 25.53%                  |
| <b>Sample size</b>      | 0.0005      | 0.0012         | 0.68  | -7.76%                  | 0.0002                        | 0.0012         | 0.849 | -15.14%                 |
| <b>Publication year</b> | 0.0082      | 0.0708         | 0.909 | -10.28%                 | 0.0018                        | 0.0684         | 0.979 | -13.08%                 |

NOTE: The dependent variable is the lnHR for PFS from each study. Weights have been assigned according to the estimated variance of the lnHR. Adjusted

R<sup>2</sup>: Proportion of between-study variance explained
